# Supplementary material for: Adaptation of peroxisome proliferator-activated receptor alpha to hibernation in bats
Source: BMC Evol Biol. 2015 May 17;15:88. doi: 10.1186/s12862-015-0373-6 (PMC4435907; doi:10.1186/s12862-015-0373-6)
Supplement: Supplementary file 4 — Different threshold settings of P value for the matrix scan of PPARα in mammals. [file 12862_2015_373_MOESM4_ESM.pdf]

## Sheet: 5e-05
Species	Type	# Putative TFBSs	# Targeted genes	# Non-targeted genes	Ratio
Balaenoptera acutorostrata	Non-hibernating	253964	22790	1114	0.953397
Bos mutus	Non-hibernating	211816	22168	1559	0.934294
Bos taurus	Non-hibernating	267077	28716	1864	0.939045
Bubalus bubalis	Non-hibernating	240807	24706	1603	0.93907
Callithrix jacchus	Non-hibernating	249714	28266	2369	0.92267
Camelus ferus	Non-hibernating	208942	20093	804	0.961526
Canis familiaris	Non-hibernating	284159	27269	1239	0.956539
Capra hircus	Non-hibernating	224582	22553	1374	0.942575
Cavia porcellus	Non-hibernating	231714	23218	1371	0.944243
Ceratotherium simum	Non-hibernating	254348	21169	902	0.959132
Chinchilla lanigera	Non-hibernating	253926	26265	1396	0.949532
Chrysochloris asiatica	Non-hibernating	298817	29555	2873	0.911404
Condylura cristata	Non-hibernating	251014	19177	394	0.979868
Dasypus novemcinctus	Non-hibernating	290753	33166	3433	0.9062
Elephantulus edwardii	Non-hibernating	329223	31660	2881	0.916592
Equus caballus	Non-hibernating	261105	23982	1041	0.958398
Felis catus	Non-hibernating	236839	23342	1083	0.95566
Gorilla gorilla	Non-hibernating	255477	28942	2019	0.934789
Heterocephalus glaber	Non-hibernating	272123	28089	2346	0.922918
Leptonychotes weddellii	Non-hibernating	185132	23413	1984	0.921881
Lipotes vexillifer	Non-hibernating	225255	21405	1568	0.931746
Macaca fascicularis	Non-hibernating	306642	33623	2043	0.942719
Microtus ochrogaster	Non-hibernating	239784	22666	1339	0.94422
Mustela putorius furo	Non-hibernating	268159	23556	1109	0.955038
Nomascus leucogenys	Non-hibernating	259092	27078	1759	0.939002
Ochotona princeps	Non-hibernating	159471	19178	1512	0.926921
Octodon degus	Non-hibernating	239871	29972	3695	0.890249
Odobenus rosmarus divergens	Non-hibernating	241803	23380	1512	0.939258
Orcinus orca	Non-hibernating	235746	20288	1025	0.951907
Otolemur garnettii	Non-hibernating	244648	25065	1723	0.93568
Ovis aries	Non-hibernating	225411	21569	1389	0.939498
Pan paniscus	Non-hibernating	275061	27136	1606	0.944124
Pan troglodytes	Non-hibernating	279653	29922	2113	0.934041
Panthera tigris altaica	Non-hibernating	237343	23475	1048	0.957265
Pantholops hodgsonii	Non-hibernating	205503	26255	3727	0.875692
Papio anubis	Non-hibernating	238955	28289	1951	0.935483
Physeter catodon	Non-hibernating	202452	22578	1198	0.949613
Pongo abelii	Non-hibernating	247253	30692	3009	0.910715
Pteropus alecto	Non-hibernating	209726	19823	804	0.961022
Pteropus vampyrus	Non-hibernating	145134	17591	1078	0.942257
Rattus norvegicus	Non-hibernating	324798	35881	1728	0.954054
Saimiri boliviensis	Non-hibernating	245724	25461	1665	0.93862
Sorex araneus	Non-hibernating	180727	20542	1679	0.924441
Sus scrofa	Non-hibernating	512265	33811	452	0.986808
Trichechus manatus latirostris	Non-hibernating	254802	20821	979	0.955092
Tupaia belangeri chinensis	Non-hibernating	260172	31863	3521	0.900492
Tursiops truncatus	Non-hibernating	143516	21738	1953	0.917564
Vicugna pacos	Non-hibernating	214897	19833	897	0.956729
Cricetulus griseus	Hibernating	233147	24935	1321	0.949688
Echinops telfairi	Hibernating	235257	24837	1874	0.929842
Eptesicus fuscus	Hibernating	232237	21454	992	0.955805
Erinaceus europaeus	Hibernating	206484	20738	1261	0.942679
Ictidomys tridecemlineatus	Hibernating	263712	23088	1216	0.949967
Jaculus jaculus	Hibernating	222706	22905	1908	0.923105
Mus musculus	Hibernating	352857	41916	2472	0.944309
Mesocricetus auratus	Hibernating	209636	20939	1410	0.93691
Monodelphis domestica	Hibernating	463125	35155	743	0.979302
Myotis brandtii	Hibernating	277215	24189	891	0.964474
Myotis davidii	Hibernating	247042	22953	927	0.961181
Myotis lucifugus	Hibernating	262816	25041	989	0.962005
Ornithorhynchus anatinus	Hibernating	222817	20556	1380	0.93709
Peromyscus maniculatus bairdii	Hibernating	268034	24913	1311	0.950008
Sarcophilus harrisii	Hibernating	314485	21331	618	0.971844
Ursus maritimus	Hibernating	183913	16984	486	0.972181

## Sheet: 1e-05
Species	Type	# Putative TFBSs	# Targeted genes	# Non-targeted genes	Ratio
Balaenoptera acutorostrata	Non-hibernating	57672	17040	6864	0.712851
Bos mutus	Non-hibernating	48957	15842	7885	0.667678
Bos taurus	Non-hibernating	61264	20203	10377	0.660661
Bubalus bubalis	Non-hibernating	55309	17919	8390	0.681098
Callithrix jacchus	Non-hibernating	53876	18555	12080	0.60568
Camelus ferus	Non-hibernating	47445	14968	5929	0.716275
Canis familiaris	Non-hibernating	64714	20039	8469	0.702925
Capra hircus	Non-hibernating	51431	16315	7612	0.681866
Cavia porcellus	Non-hibernating	54120	16930	7659	0.688519
Ceratotherium simum	Non-hibernating	58046	16023	6048	0.725975
Chinchilla lanigera	Non-hibernating	56829	18782	8879	0.679007
Chrysochloris asiatica	Non-hibernating	60158	18551	13877	0.572067
Condylura cristata	Non-hibernating	47949	14730	4841	0.752644
Dasypus novemcinctus	Non-hibernating	61029	21238	15361	0.580289
Elephantulus edwardii	Non-hibernating	71824	20640	13901	0.597551
Equus caballus	Non-hibernating	59103	17895	7128	0.715142
Felis catus	Non-hibernating	52437	17050	7375	0.698055
Gorilla gorilla	Non-hibernating	55702	19780	11181	0.638868
Heterocephalus glaber	Non-hibernating	60824	19325	11110	0.63496
Leptonychotes weddellii	Non-hibernating	41337	16074	9323	0.632909
Lipotes vexillifer	Non-hibernating	50487	15540	7433	0.676446
Macaca fascicularis	Non-hibernating	66948	23155	12511	0.649218
Microtus ochrogaster	Non-hibernating	67948	17458	6547	0.727265
Mustela putorius furo	Non-hibernating	60727	17468	7197	0.70821
Nomascus leucogenys	Non-hibernating	55751	18621	10216	0.645733
Ochotona princeps	Non-hibernating	35167	13032	7658	0.62987
Octodon degus	Non-hibernating	53989	19094	14573	0.567143
Odobenus rosmarus divergens	Non-hibernating	53539	16642	8250	0.668568
Orcinus orca	Non-hibernating	52833	15139	6174	0.710318
Otolemur garnettii	Non-hibernating	53954	16943	9845	0.632485
Ovis aries	Non-hibernating	51882	15695	7263	0.68364
Pan paniscus	Non-hibernating	60648	19115	9627	0.665055
Pan troglodytes	Non-hibernating	60685	20498	11537	0.639863
Panthera tigris altaica	Non-hibernating	51669	16981	7542	0.692452
Pantholops hodgsonii	Non-hibernating	47125	16933	13049	0.564772
Papio anubis	Non-hibernating	52176	19244	10996	0.636376
Physeter catodon	Non-hibernating	46903	16558	7218	0.696417
Pongo abelii	Non-hibernating	53743	20096	13605	0.596303
Pteropus alecto	Non-hibernating	49034	14980	5647	0.726233
Pteropus vampyrus	Non-hibernating	33905	12579	6090	0.673791
Rattus norvegicus	Non-hibernating	89522	26695	10914	0.709804
Saimiri boliviensis	Non-hibernating	53925	17543	9583	0.646723
Sorex araneus	Non-hibernating	40004	14038	8183	0.631745
Sus scrofa	Non-hibernating	86068	26123	8140	0.762426
Trichechus manatus latirostris	Non-hibernating	54436	15379	6421	0.705459
Tupaia belangeri chinensis	Non-hibernating	58451	20479	14905	0.578764
Tursiops truncatus	Non-hibernating	32901	14466	9225	0.610612
Vicugna pacos	Non-hibernating	48702	14837	5893	0.715726
Cricetulus griseus	Hibernating	63089	18626	7630	0.7094
Echinops telfairi	Hibernating	52938	17142	9569	0.641758
Eptesicus fuscus	Hibernating	49404	15543	6903	0.692462
Erinaceus europaeus	Hibernating	43234	14122	7877	0.641938
Ictidomys tridecemlineatus	Hibernating	63235	17253	7051	0.709883
Jaculus jaculus	Hibernating	60128	16528	8285	0.666102
Mus musculus	Hibernating	100937	30831	13557	0.69458
Mesocricetus auratus	Hibernating	58307	15903	6446	0.711575
Monodelphis domestica	Hibernating	121190	28324	7574	0.789013
Myotis brandtii	Hibernating	56709	17490	7590	0.697368
Myotis davidii	Hibernating	51164	16491	7389	0.690578
Myotis lucifugus	Hibernating	54009	17838	8192	0.685286
Ornithorhynchus anatinus	Hibernating	89560	17552	4384	0.800146
Peromyscus maniculatus bairdii	Hibernating	77549	19263	6961	0.734556
Sarcophilus harrisii	Hibernating	65473	16573	5376	0.755069
Ursus maritimus	Hibernating	42357	12997	4473	0.743961

## Sheet: 5e-06
Species	Type	# Putative TFBSs	# Targeted genes	# Non-targeted genes	Ratio
Balaenoptera acutorostrata	Non-hibernating	33939	13850	10054	0.579401
Bos mutus	Non-hibernating	27753	12394	11333	0.522358
Bos taurus	Non-hibernating	33882	15598	14982	0.510072
Bubalus bubalis	Non-hibernating	30534	13985	12324	0.531567
Callithrix jacchus	Non-hibernating	30516	14020	16615	0.457646
Camelus ferus	Non-hibernating	27663	12024	8873	0.575394
Canis familiaris	Non-hibernating	36847	15851	12657	0.556019
Capra hircus	Non-hibernating	29174	12716	11211	0.53145
Cavia porcellus	Non-hibernating	30268	13213	11376	0.537354
Ceratotherium simum	Non-hibernating	33702	13029	9042	0.590322
Chinchilla lanigera	Non-hibernating	31432	14367	13294	0.519396
Chrysochloris asiatica	Non-hibernating	33668	14228	18200	0.438757
Condylura cristata	Non-hibernating	25958	11487	8084	0.58694
Dasypus novemcinctus	Non-hibernating	33957	16157	20442	0.44146
Elephantulus edwardii	Non-hibernating	39918	15766	18775	0.456443
Equus caballus	Non-hibernating	34372	14419	10604	0.57623
Felis catus	Non-hibernating	29179	13308	11117	0.544852
Gorilla gorilla	Non-hibernating	31892	15240	15721	0.492232
Heterocephalus glaber	Non-hibernating	34713	15133	15302	0.497224
Leptonychotes weddellii	Non-hibernating	23322	12309	13088	0.484664
Lipotes vexillifer	Non-hibernating	29312	12415	10558	0.540417
Macaca fascicularis	Non-hibernating	38290	18031	17635	0.505552
Microtus ochrogaster	Non-hibernating	43722	14841	9164	0.618246
Mustela putorius furo	Non-hibernating	35059	14075	10590	0.570647
Nomascus leucogenys	Non-hibernating	31786	14500	14337	0.502826
Ochotona princeps	Non-hibernating	19994	10019	10671	0.484244
Octodon degus	Non-hibernating	30274	14310	19357	0.425045
Odobenus rosmarus divergens	Non-hibernating	30368	13135	11757	0.52768
Orcinus orca	Non-hibernating	30915	12315	8998	0.577816
Otolemur garnettii	Non-hibernating	30919	13193	13595	0.492497
Ovis aries	Non-hibernating	29242	12233	10725	0.532843
Pan paniscus	Non-hibernating	34381	14843	13899	0.516422
Pan troglodytes	Non-hibernating	34618	15814	16221	0.493648
Panthera tigris altaica	Non-hibernating	29699	13430	11093	0.547649
Pantholops hodgsonii	Non-hibernating	25945	12608	17374	0.420519
Papio anubis	Non-hibernating	29657	14861	15379	0.491435
Physeter catodon	Non-hibernating	26763	12968	10808	0.545424
Pongo abelii	Non-hibernating	31392	15437	18264	0.458058
Pteropus alecto	Non-hibernating	28312	12148	8479	0.588937
Pteropus vampyrus	Non-hibernating	19592	9913	8756	0.530987
Rattus norvegicus	Non-hibernating	55300	21535	16074	0.572602
Saimiri boliviensis	Non-hibernating	30517	13657	13469	0.503465
Sorex araneus	Non-hibernating	23226	10911	11310	0.491022
Sus scrofa	Non-hibernating	44818	20457	13806	0.597058
Trichechus manatus latirostris	Non-hibernating	30216	12285	9515	0.563532
Tupaia belangeri chinensis	Non-hibernating	32606	15277	20107	0.431749
Tursiops truncatus	Non-hibernating	18873	10869	12822	0.458782
Vicugna pacos	Non-hibernating	28017	11955	8775	0.5767
Cricetulus griseus	Hibernating	41542	15818	10438	0.602453
Echinops telfairi	Hibernating	29345	13145	13566	0.492119
Eptesicus fuscus	Hibernating	26732	11791	10655	0.525305
Erinaceus europaeus	Hibernating	23452	10581	11418	0.480976
Ictidomys tridecemlineatus	Hibernating	36142	13934	10370	0.573321
Jaculus jaculus	Hibernating	35021	12986	11827	0.523355
Mus musculus	Hibernating	62878	25035	19353	0.564004
Mesocricetus auratus	Hibernating	37777	13476	8873	0.60298
Monodelphis domestica	Hibernating	58460	22018	13880	0.613349
Myotis brandtii	Hibernating	30083	13201	11879	0.526356
Myotis davidii	Hibernating	27376	12533	11347	0.524832
Myotis lucifugus	Hibernating	27575	13148	12882	0.505109
Ornithorhynchus anatinus	Hibernating	70672	16329	5607	0.744393
Peromyscus maniculatus bairdii	Hibernating	50556	16437	9787	0.626792
Sarcophilus harrisii	Hibernating	37021	13446	8503	0.612602
Ursus maritimus	Hibernating	23944	10311	7159	0.590212

## Sheet: 1e-06
Species	Type	# Putative TFBSs	# Targeted genes	# Non-targeted genes	Ratio
Balaenoptera acutorostrata	Non-hibernating	8344	6056	17848	0.253347
Bos mutus	Non-hibernating	6610	5127	18600	0.216083
Bos taurus	Non-hibernating	7705	6175	24405	0.201929
Bubalus bubalis	Non-hibernating	7076	5580	20729	0.212095
Callithrix jacchus	Non-hibernating	6287	4944	25691	0.161384
Camelus ferus	Non-hibernating	6550	4949	15948	0.236828
Canis familiaris	Non-hibernating	7899	6136	22372	0.215238
Capra hircus	Non-hibernating	6789	5178	18749	0.216408
Cavia porcellus	Non-hibernating	6321	4945	19644	0.201106
Ceratotherium simum	Non-hibernating	7998	5631	16440	0.255131
Chinchilla lanigera	Non-hibernating	7142	5636	22025	0.203753
Chrysochloris asiatica	Non-hibernating	7565	5579	26849	0.172043
Condylura cristata	Non-hibernating	5652	4431	15140	0.226406
Dasypus novemcinctus	Non-hibernating	7266	5852	30747	0.159895
Elephantulus edwardii	Non-hibernating	8228	6012	28529	0.174054
Equus caballus	Non-hibernating	8371	6164	18859	0.246333
Felis catus	Non-hibernating	6523	5174	19251	0.211832
Gorilla gorilla	Non-hibernating	7482	5871	25090	0.189626
Heterocephalus glaber	Non-hibernating	6985	5428	25007	0.178347
Leptonychotes weddellii	Non-hibernating	5527	4667	20730	0.183762
Lipotes vexillifer	Non-hibernating	6964	5205	17768	0.22657
Macaca fascicularis	Non-hibernating	8238	6649	29017	0.186424
Microtus ochrogaster	Non-hibernating	12311	7389	16616	0.307811
Mustela putorius furo	Non-hibernating	7236	5398	19267	0.218853
Nomascus leucogenys	Non-hibernating	6931	5464	23373	0.189479
Ochotona princeps	Non-hibernating	4944	3972	16718	0.191977
Octodon degus	Non-hibernating	6519	5190	28477	0.154157
Odobenus rosmarus divergens	Non-hibernating	6888	5304	19588	0.213081
Orcinus orca	Non-hibernating	7527	5372	15941	0.252053
Otolemur garnettii	Non-hibernating	6642	5003	21785	0.186763
Ovis aries	Non-hibernating	6764	4995	17963	0.217571
Pan paniscus	Non-hibernating	8008	6012	22730	0.209171
Pan troglodytes	Non-hibernating	8080	6175	25860	0.192758
Panthera tigris altaica	Non-hibernating	6858	5433	19090	0.221547
Pantholops hodgsonii	Non-hibernating	5991	4867	25115	0.162331
Papio anubis	Non-hibernating	6482	5342	24898	0.176653
Physeter catodon	Non-hibernating	6275	5152	18624	0.216689
Pongo abelii	Non-hibernating	7559	5957	27744	0.17676
Pteropus alecto	Non-hibernating	6968	5330	15297	0.258399
Pteropus vampyrus	Non-hibernating	4760	3893	14776	0.208528
Rattus norvegicus	Non-hibernating	15316	10091	27518	0.268313
Saimiri boliviensis	Non-hibernating	6337	5003	22123	0.184436
Sorex araneus	Non-hibernating	6127	4521	17700	0.203456
Sus scrofa	Non-hibernating	8866	7435	26828	0.216998
Trichechus manatus latirostris	Non-hibernating	6570	4923	16877	0.225826
Tupaia belangeri chinensis	Non-hibernating	7088	5538	29846	0.156511
Tursiops truncatus	Non-hibernating	4479	3850	19841	0.162509
Vicugna pacos	Non-hibernating	6630	4933	15797	0.237964
Cricetulus griseus	Hibernating	10907	7370	18886	0.280698
Echinops telfairi	Hibernating	5722	4541	22170	0.170005
Eptesicus fuscus	Hibernating	6932	5004	17442	0.222935
Erinaceus europaeus	Hibernating	5124	3933	18066	0.178781
Ictidomys tridecemlineatus	Hibernating	8580	6093	18211	0.250699
Jaculus jaculus	Hibernating	7798	5215	19598	0.210172
Mus musculus	Hibernating	16507	11299	33089	0.254551
Mesocricetus auratus	Hibernating	9848	6404	15945	0.286545
Monodelphis domestica	Hibernating	15526	10320	25578	0.287481
Myotis brandtii	Hibernating	7564	5578	19502	0.222408
Myotis davidii	Hibernating	6911	5199	18681	0.217714
Myotis lucifugus	Hibernating	6889	5362	20668	0.205993
Ornithorhynchus anatinus	Hibernating	4907	3940	17996	0.179613
Peromyscus maniculatus bairdii	Hibernating	13429	8031	18193	0.306246
Sarcophilus harrisii	Hibernating	7961	5567	16382	0.253633
Ursus maritimus	Hibernating	5388	4029	13441	0.230624

## Sheet: 5e-07
Species	Type	# Putative TFBSs	# Targeted genes	# Non-targeted genes	Ratio
Balaenoptera acutorostrata	Non-hibernating	5091	4182	19722	0.17495
Bos mutus	Non-hibernating	3461	3069	20658	0.129346
Bos taurus	Non-hibernating	5140	4508	26072	0.147417
Bubalus bubalis	Non-hibernating	4727	4037	22272	0.153446
Callithrix jacchus	Non-hibernating	3865	3395	27240	0.110821
Camelus ferus	Non-hibernating	4018	3387	17510	0.162081
Canis familiaris	Non-hibernating	4859	4285	24223	0.150309
Capra hircus	Non-hibernating	4397	3673	20254	0.153509
Cavia porcellus	Non-hibernating	3759	3275	21314	0.13319
Ceratotherium simum	Non-hibernating	5042	3972	18099	0.179965
Chinchilla lanigera	Non-hibernating	4518	3932	23729	0.14215
Chrysochloris asiatica	Non-hibernating	4214	3516	28912	0.108425
Condylura cristata	Non-hibernating	3562	3047	16524	0.15569
Dasypus novemcinctus	Non-hibernating	4324	3887	32712	0.106205
Elephantulus edwardii	Non-hibernating	4974	4141	30400	0.119887
Equus caballus	Non-hibernating	5218	4261	20762	0.170283
Felis catus	Non-hibernating	4219	3670	20755	0.150256
Gorilla gorilla	Non-hibernating	4760	4110	26851	0.132748
Heterocephalus glaber	Non-hibernating	4090	3526	26909	0.115853
Leptonychotes weddellii	Non-hibernating	3231	2993	22404	0.117849
Lipotes vexillifer	Non-hibernating	4385	3626	19347	0.157837
Macaca fascicularis	Non-hibernating	5071	4558	31108	0.127797
Microtus ochrogaster	Non-hibernating	8924	5882	18123	0.245032
Mustela putorius furo	Non-hibernating	4660	3894	20771	0.157876
Nomascus leucogenys	Non-hibernating	4230	3717	25120	0.128897
Ochotona princeps	Non-hibernating	2824	2543	18147	0.12291
Octodon degus	Non-hibernating	4218	3686	29981	0.109484
Odobenus rosmarus divergens	Non-hibernating	4248	3639	21253	0.146192
Orcinus orca	Non-hibernating	4763	3821	17492	0.17928
Otolemur garnettii	Non-hibernating	4111	3474	23314	0.129685
Ovis aries	Non-hibernating	4362	3542	19416	0.154282
Pan paniscus	Non-hibernating	5180	4285	24457	0.149085
Pan troglodytes	Non-hibernating	5217	4347	27688	0.135695
Panthera tigris altaica	Non-hibernating	4222	3678	20845	0.149982
Pantholops hodgsonii	Non-hibernating	3883	3401	26581	0.113435
Papio anubis	Non-hibernating	4187	3774	26466	0.124802
Physeter catodon	Non-hibernating	4031	3572	20204	0.150236
Pongo abelii	Non-hibernating	4971	4233	29468	0.125605
Pteropus alecto	Non-hibernating	4281	3617	17010	0.175353
Pteropus vampyrus	Non-hibernating	2914	2624	16045	0.140554
Rattus norvegicus	Non-hibernating	11100	8013	29596	0.213061
Saimiri boliviensis	Non-hibernating	3919	3412	23714	0.125783
Sorex araneus	Non-hibernating	3451	2882	19339	0.129697
Sus scrofa	Non-hibernating	5718	5251	29012	0.153256
Trichechus manatus latirostris	Non-hibernating	3907	3281	18519	0.150505
Tupaia belangeri chinensis	Non-hibernating	4601	3891	31493	0.109965
Tursiops truncatus	Non-hibernating	2748	2505	21186	0.105736
Vicugna pacos	Non-hibernating	4156	3455	17275	0.166667
Cricetulus griseus	Hibernating	7440	5526	20730	0.210466
Echinops telfairi	Hibernating	3661	3197	23514	0.119689
Eptesicus fuscus	Hibernating	4456	3611	18835	0.160875
Erinaceus europaeus	Hibernating	3517	2897	19102	0.131688
Ictidomys tridecemlineatus	Hibernating	5111	4082	20222	0.167956
Jaculus jaculus	Hibernating	5385	3927	20886	0.158264
Mus musculus	Hibernating	11967	8924	35464	0.201045
Mesocricetus auratus	Hibernating	7092	5060	17289	0.226408
Monodelphis domestica	Hibernating	10570	7756	28142	0.216057
Myotis brandtii	Hibernating	5085	4120	20960	0.164274
Myotis davidii	Hibernating	4381	3640	20240	0.152429
Myotis lucifugus	Hibernating	4773	4050	21980	0.15559
Ornithorhynchus anatinus	Hibernating	2952	2574	19362	0.117341
Peromyscus maniculatus bairdii	Hibernating	8468	5709	20515	0.217701
Sarcophilus harrisii	Hibernating	4773	3739	18210	0.170349
Ursus maritimus	Hibernating	3497	2856	14614	0.16348

## Sheet: 1e-07
Species	Type	# Putative TFBSs	# Targeted genes	# Non-targeted genes	Ratio
Balaenoptera acutorostrata	Non-hibernating	1145	1172	22732	0.0490295
Bos mutus	Non-hibernating	1221	1234	22493	0.0520083
Bos taurus	Non-hibernating	1515	1607	28973	0.0525507
Bubalus bubalis	Non-hibernating	1384	1417	24892	0.0538599
Callithrix jacchus	Non-hibernating	1153	1145	29490	0.0373756
Camelus ferus	Non-hibernating	921	935	19962	0.0447433
Canis familiaris	Non-hibernating	1461	1502	27006	0.052687
Capra hircus	Non-hibernating	1214	1246	22681	0.0520751
Cavia porcellus	Non-hibernating	1141	1146	23443	0.0466062
Ceratotherium simum	Non-hibernating	1589	1523	20548	0.0690046
Chinchilla lanigera	Non-hibernating	1324	1358	26303	0.0490944
Chrysochloris asiatica	Non-hibernating	1380	1320	31108	0.0407056
Condylura cristata	Non-hibernating	1083	1077	18494	0.0550304
Dasypus novemcinctus	Non-hibernating	1354	1427	35172	0.0389901
Elephantulus edwardii	Non-hibernating	1328	1352	33189	0.0391419
Equus caballus	Non-hibernating	1150	1184	23839	0.0473165
Felis catus	Non-hibernating	1157	1188	23237	0.0486387
Gorilla gorilla	Non-hibernating	1338	1386	29575	0.044766
Heterocephalus glaber	Non-hibernating	1289	1308	29127	0.0429768
Leptonychotes weddellii	Non-hibernating	703	739	24658	0.0290979
Lipotes vexillifer	Non-hibernating	1285	1269	21704	0.0552388
Macaca fascicularis	Non-hibernating	1526	1641	34025	0.0460102
Microtus ochrogaster	Non-hibernating	2922	2481	21524	0.103353
Mustela putorius furo	Non-hibernating	1299	1301	23364	0.0527468
Nomascus leucogenys	Non-hibernating	1294	1339	27498	0.0464334
Ochotona princeps	Non-hibernating	854	889	19801	0.0429676
Octodon degus	Non-hibernating	1366	1348	32319	0.0400392
Odobenus rosmarus divergens	Non-hibernating	1176	1192	23700	0.0478869
Orcinus orca	Non-hibernating	1361	1303	20010	0.0611364
Otolemur garnettii	Non-hibernating	1217	1198	25590	0.0447215
Ovis aries	Non-hibernating	1231	1226	21732	0.0534019
Pan paniscus	Non-hibernating	1397	1429	27313	0.0497182
Pan troglodytes	Non-hibernating	1399	1443	30592	0.0450445
Panthera tigris altaica	Non-hibernating	912	967	23556	0.0394324
Pantholops hodgsonii	Non-hibernating	966	1013	28969	0.0337869
Papio anubis	Non-hibernating	1128	1149	29091	0.037996
Physeter catodon	Non-hibernating	1223	1244	22532	0.0523217
Pongo abelii	Non-hibernating	1284	1294	32407	0.0383965
Pteropus alecto	Non-hibernating	1275	1274	19353	0.0617637
Pteropus vampyrus	Non-hibernating	944	953	17716	0.0510472
Rattus norvegicus	Non-hibernating	3728	3377	34232	0.0897923
Saimiri boliviensis	Non-hibernating	1189	1249	25877	0.0460444
Sorex araneus	Non-hibernating	1098	1072	21149	0.0482427
Sus scrofa	Non-hibernating	1202	1298	32965	0.0378834
Trichechus manatus latirostris	Non-hibernating	1248	1198	20602	0.0549541
Tupaia belangeri chinensis	Non-hibernating	1278	1251	34133	0.035355
Tursiops truncatus	Non-hibernating	759	758	22933	0.0319953
Vicugna pacos	Non-hibernating	922	936	19794	0.045152
Cricetulus griseus	Hibernating	2270	2070	24186	0.0788391
Echinops telfairi	Hibernating	891	916	25795	0.034293
Eptesicus fuscus	Hibernating	1263	1209	21237	0.0538626
Erinaceus europaeus	Hibernating	982	966	21033	0.0439111
Ictidomys tridecemlineatus	Hibernating	1387	1341	22963	0.0551761
Jaculus jaculus	Hibernating	2488	2056	22757	0.0828598
Mus musculus	Hibernating	5257	4670	39718	0.105209
Mesocricetus auratus	Hibernating	2233	1978	20371	0.0885051
Monodelphis domestica	Hibernating	4430	3709	32189	0.103321
Myotis brandtii	Hibernating	1341	1290	23790	0.0514354
Myotis davidii	Hibernating	1232	1202	22678	0.050335
Myotis lucifugus	Hibernating	1139	1161	24869	0.0446024
Ornithorhynchus anatinus	Hibernating	1333	1273	20663	0.0580325
Peromyscus maniculatus bairdii	Hibernating	3154	2689	23535	0.10254
Sarcophilus harrisii	Hibernating	892	894	21055	0.0407308
Ursus maritimus	Hibernating	967	932	16538	0.0533486

## Sheet: 5e-08
Species	Type	# Putative TFBSs	# Targeted genes	# Non-targeted genes	Ratio
Balaenoptera acutorostrata	Non-hibernating	608	655	23249	0.0274013
Bos mutus	Non-hibernating	545	570	23157	0.0240233
Bos taurus	Non-hibernating	947	1030	29550	0.0336821
Bubalus bubalis	Non-hibernating	867	907	25402	0.0344749
Callithrix jacchus	Non-hibernating	557	563	30072	0.0183777
Camelus ferus	Non-hibernating	478	503	20394	0.0240704
Canis familiaris	Non-hibernating	751	821	27687	0.0287989
Capra hircus	Non-hibernating	514	561	23366	0.0234463
Cavia porcellus	Non-hibernating	599	626	23963	0.0254585
Ceratotherium simum	Non-hibernating	851	862	21209	0.0390558
Chinchilla lanigera	Non-hibernating	545	596	27065	0.0215466
Chrysochloris asiatica	Non-hibernating	681	686	31742	0.0211546
Condylura cristata	Non-hibernating	401	429	19142	0.0219202
Dasypus novemcinctus	Non-hibernating	686	755	35844	0.020629
Elephantulus edwardii	Non-hibernating	600	658	33883	0.0190498
Equus caballus	Non-hibernating	583	615	24408	0.0245774
Felis catus	Non-hibernating	715	764	23661	0.0312794
Gorilla gorilla	Non-hibernating	464	508	30453	0.0164077
Heterocephalus glaber	Non-hibernating	672	706	29729	0.023197
Leptonychotes weddellii	Non-hibernating	361	391	25006	0.0153955
Lipotes vexillifer	Non-hibernating	525	558	22415	0.0242894
Macaca fascicularis	Non-hibernating	775	886	34780	0.0248416
Microtus ochrogaster	Non-hibernating	2060	1835	22170	0.0764424
Mustela putorius furo	Non-hibernating	801	834	23831	0.0338131
Nomascus leucogenys	Non-hibernating	620	662	28175	0.0229566
Ochotona princeps	Non-hibernating	480	514	20176	0.0248429
Octodon degus	Non-hibernating	688	702	32965	0.0208513
Odobenus rosmarus divergens	Non-hibernating	481	525	24367	0.0210911
Orcinus orca	Non-hibernating	587	602	20711	0.0282457
Otolemur garnettii	Non-hibernating	571	590	26198	0.0220248
Ovis aries	Non-hibernating	538	559	22399	0.0243488
Pan paniscus	Non-hibernating	700	746	27996	0.025955
Pan troglodytes	Non-hibernating	695	739	31296	0.0230685
Panthera tigris altaica	Non-hibernating	494	540	23983	0.0220201
Pantholops hodgsonii	Non-hibernating	493	537	29445	0.0179107
Papio anubis	Non-hibernating	482	503	29737	0.0166336
Physeter catodon	Non-hibernating	778	817	22959	0.0343624
Pongo abelii	Non-hibernating	642	684	33017	0.0202961
Pteropus alecto	Non-hibernating	697	737	19890	0.0357299
Pteropus vampyrus	Non-hibernating	529	558	18111	0.0298891
Rattus norvegicus	Non-hibernating	2667	2483	35126	0.0660214
Saimiri boliviensis	Non-hibernating	594	641	26485	0.0236305
Sorex araneus	Non-hibernating	642	636	21585	0.0286216
Sus scrofa	Non-hibernating	648	729	33534	0.0212766
Trichechus manatus latirostris	Non-hibernating	642	642	21158	0.0294495
Tupaia belangeri chinensis	Non-hibernating	780	788	34596	0.02227
Tursiops truncatus	Non-hibernating	386	403	23288	0.0170107
Vicugna pacos	Non-hibernating	491	522	20208	0.0251809
Cricetulus griseus	Hibernating	1635	1535	24721	0.0584628
Echinops telfairi	Hibernating	433	464	26247	0.0173711
Eptesicus fuscus	Hibernating	701	692	21754	0.0308295
Erinaceus europaeus	Hibernating	677	675	21324	0.0306832
Ictidomys tridecemlineatus	Hibernating	690	706	23598	0.0290487
Jaculus jaculus	Hibernating	983	934	23879	0.0376416
Mus musculus	Hibernating	3338	3179	41209	0.0716185
Mesocricetus auratus	Hibernating	1567	1441	20908	0.0644772
Monodelphis domestica	Hibernating	783	858	35040	0.0239011
Myotis brandtii	Hibernating	719	729	24351	0.029067
Myotis davidii	Hibernating	634	654	23226	0.0273869
Myotis lucifugus	Hibernating	609	636	25394	0.0244333
Ornithorhynchus anatinus	Hibernating	389	397	21539	0.0180981
Peromyscus maniculatus bairdii	Hibernating	2245	1997	24227	0.0761516
Sarcophilus harrisii	Hibernating	414	427	21522	0.0194542
Ursus maritimus	Hibernating	615	617	16853	0.0353177
